# Supplementary material for: Engineering of Primary Human B cells with CRISPR/Cas9 Targeted Nuclease
Source: PubMed Central journal article supplement (PMC6092381; doi:10.1038/s41598-018-30358-0), 2018-08-14
Supplement: 41598_2018_30358_MOESM1_ESM.pdf [file 41598_2018_30358_MOESM1_ESM.pdf]

# **Engineering of Primary Human B cells with CRISPR/Cas9 Targeted Nuclease**

**Matthew J. Johnson<sup>123</sup>, Kanut Laoharawee<sup>123</sup>, Walker S. Lahr<sup>123</sup>, Beau R. Webber<sup>123</sup>,  
Branden S. Moriarity<sup>123\*</sup>**

<sup>1</sup>Department of Pediatrics, University of Minnesota, Minneapolis MN 55455, USA; <sup>2</sup>Center for Genomic Engineering, University of Minnesota, Minneapolis MN 55455, USA; <sup>3</sup>Masonic Cancer Center, University of Minnesota, Minneapolis MN 55455

\*Corresponding Author: Branden S. Moriarity, Cancer and Cardiovascular Research Building, 2231 6<sup>th</sup> St. SE, University of Minnesota, Minneapolis, MN 55455, USA. Ph: +612 625 2226; Email: mori0164@umn.edu

# Supplementary Figure 1

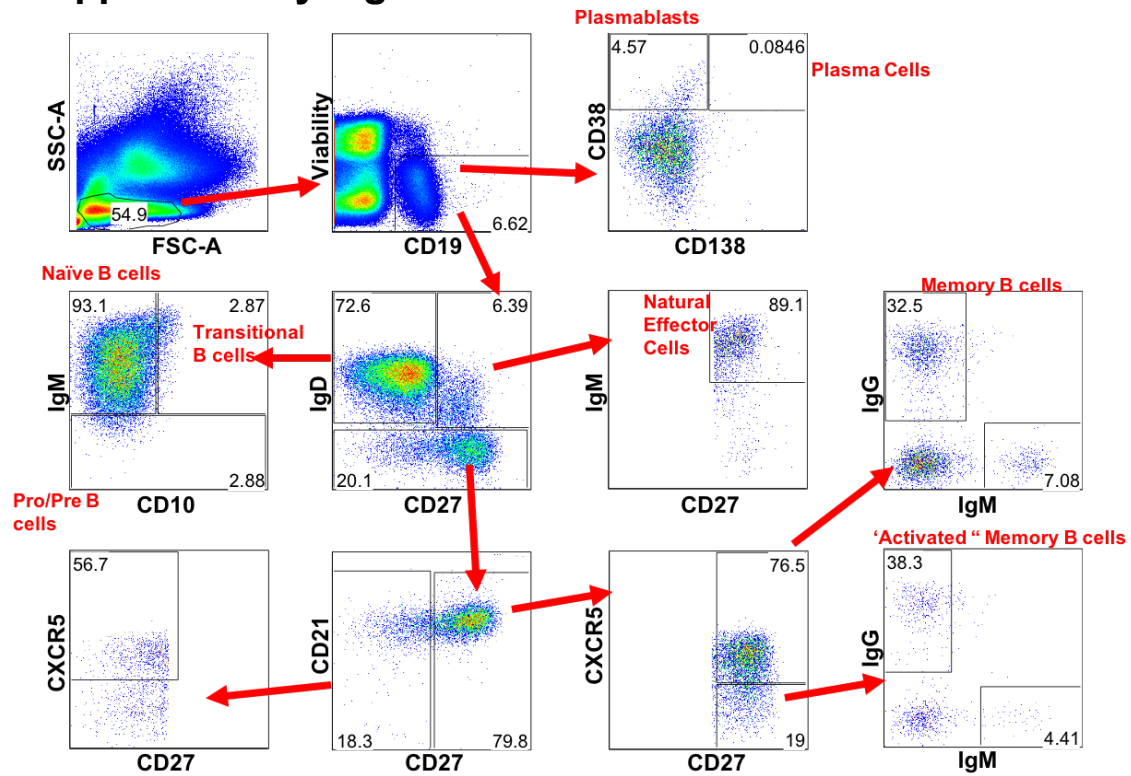

## *B cell subsets in the peripheral blood*

Gating scheme used for the identification of B cell subsets by flow cytometry.

## Supplementary Figure 2

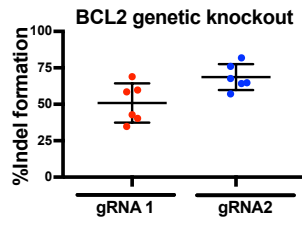

### *Knockout of BCL2*

Percent indel formation with two different gRNAs targeting BCL2.

## Supplementary Table 1

| Specificity | Fluorophore   | Clone    | Vendor        |
|-------------|---------------|----------|---------------|
| CD10        | BV711         | HI10a    | Biologend     |
| CD19        | BUV395        | SJ25C1   | BD Horizon    |
| CD20        | PE/Dazzle 594 | HIT2     | Biologend     |
| CD21        | BV650         | B-ly4    | BD OptiBuild  |
| CD27        | BV605         | O323     | Biologend     |
| CD38        | BUV496        | HIT2     | BD Horizon    |
| CD138       | BV510         | MI15     | Biologend     |
| CXCR5       | BV421         | RF8B2    | BD Horizon    |
| IgD         | PE            | IA6-2    | BD Pharmingen |
| IgG         | APC           | M1310G05 | Biologend     |
| IgM         | PE-Cy7        | MHM-88   | Biologend     |

### *Flow cytometry antibodies*

List of antibodies used for flow cytometry in this study

Unmodified, full-sized images of gels used to construct Figures 5C and 6C.

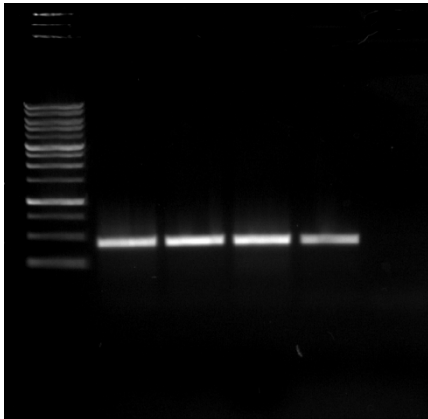

**Figure 5C left panel**

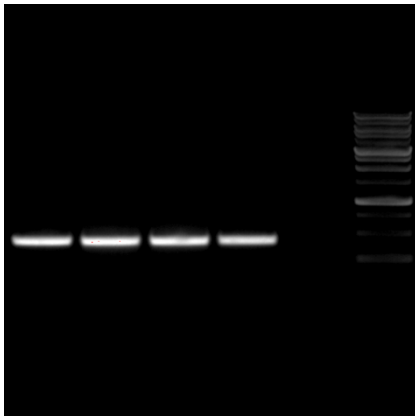

**Figure 5C central panel**

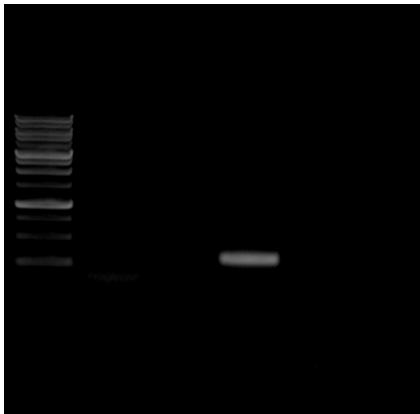

**Figure 5C right panel**

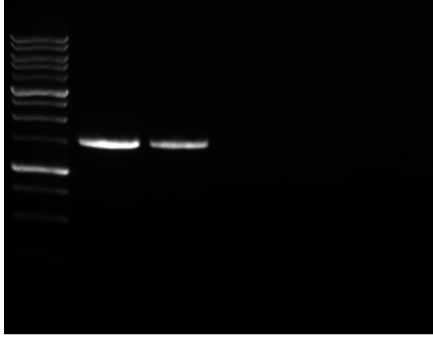

Figure 6C
